# Supplementary material for: Muscle Oxygenation Level Might Trigger the Regulation of Capillary Venous Blood Filling during Fatiguing Isometric Muscle Actions
Source: MDPI journal article supplement (doi:10.3390/diagnostics11111973), 2021-10-23
Supplement: s1 [file s1]

Article

# Muscle oxygenation level might trigger the regulation of capillary venous blood filling during fatiguing isometric muscle actions

(Dech S, Bittmann FN and Schaefer LV)

## Supplementary Materials

**Table S1.** Single values of fatiguing measurements of type I behavior.

| IMA            | subject no._arm | baseline value<br>SvO <sub>2</sub> in % | baseline value rHb<br>in AU | SvO <sub>2</sub> min.<br>in % | TTF<br>in s  | SvO <sub>2</sub> SS mean<br>in % | rHb SS mean<br>in AU | extent of deoxygenation<br>in pp (%) | extent of rHb decrease<br>in AU (%) | time until min. of rHb<br>before SS<br>in s | time until SvO <sub>2</sub> SS<br>in s | time until rHb SS<br>in s | SvO <sub>2</sub> at RP <sub>1</sub><br>in % | SvO <sub>2</sub> at RP <sub>2</sub><br>in % | $\rho$<br>between rHb & SvO <sub>2</sub> |
|----------------|-----------------|-----------------------------------------|-----------------------------|-------------------------------|--------------|----------------------------------|----------------------|--------------------------------------|-------------------------------------|---------------------------------------------|----------------------------------------|---------------------------|---------------------------------------------|---------------------------------------------|------------------------------------------|
| type I         |                 |                                         |                             |                               |              |                                  |                      |                                      |                                     |                                             |                                        |                           |                                             |                                             |                                          |
| fatiguing HIMA | 01_le           | 80.74                                   | 58.89                       | 65.22                         | 43.08        | 67.83                            | 43.40                | 12.91 (10.42)                        | 15.49 (9.12)                        | 15.68                                       | 15.50                                  | 15.68                     | -                                           | -                                           | 0.86                                     |
|                | 06_le           | 67.54                                   | 48.63                       | 60.23                         | 70.48        | 61.40                            | 47.76                | 6.14 (4.14)                          | 0.87 (0.42)                         | 9.90                                        | 17.13                                  | 9.90                      | -                                           | -                                           | 0.40                                     |
|                | 07_le           | 79.43                                   | 51.37                       | 69.00                         | 45.03        | 69.67                            | 43.03                | 9.77 (7.76)                          | 8.34 (4.29)                         | 13.48                                       | 13.30                                  | 13.48                     | -                                           | -                                           | 0.81                                     |
|                | 17_le           | 80.40                                   | 58.75                       | 68.15                         | 48.93        | 69.09                            | 45.36                | 11.30 (9.09)                         | 13.39 (7.87)                        | 15.93                                       | 15.93                                  | 15.93                     | -                                           | -                                           | 0.99                                     |
|                | 25_le           | 75.92                                   | 75.88                       | 63.25                         | 39.15        | 64.29                            | 58.55                | 11.63 (8.83)                         | 17.33 (13.15)                       | 11.70                                       | 13.68                                  | 11.70                     | -                                           | -                                           | 0.57                                     |
|                | 02_ri           | 81.10                                   | 66.18                       | 63.00                         | 37.20        | 63.29                            | 43.71                | 17.81 (14.45)                        | 22.47 (14.87)                       | 8.08                                        | 9.85                                   | 10.78                     | -                                           | -                                           | 0.48                                     |
|                | 07_ri           | 78.44                                   | 55.07                       | 59.00                         | 46.98        | 60.74                            | 42.96                | 17.70 (13.89)                        | 12.10 (6.66)                        | 8.40                                        | 14.90                                  | 25.05                     | -                                           | -                                           | 0.65                                     |
| fatiguing PIMA | 01_le           | 82.62                                   | 61.28                       | 67.06                         | 47.94        | 69.26                            | 46.95                | 13.36 (11.04)                        | 14.33 (8.78)                        | 15.23                                       | 17.93                                  | 18.13                     | -                                           | -                                           | 0.93                                     |
|                | 06_le           | 73.91                                   | 53.99                       | 60.21                         | 48.12        | 61.03                            | 47.98                | 12.87 (9.51)                         | 6.01 (3.24)                         | 8.53                                        | 14.85                                  | 8.53                      | -                                           | -                                           | 0.19                                     |
|                | 07_le           | 80.32                                   | 56.38                       | 71.00                         | 31.96        | 71.75                            | 48.90                | 8.57 (6.88)                          | 7.48 (4.22)                         | 7.15                                        | 20.70                                  | 7.88                      | -                                           | -                                           | 0.33                                     |
| <b>M</b>       |                 | <b>78.04</b>                            | <b>58.64</b>                | <b>64.61</b>                  | <b>45.88</b> | <b>65.84</b>                     | <b>46.86</b>         | <b>12.21 (9.60)</b>                  | <b>11.78 (7.26)</b>                 | <b>11.41</b>                                | <b>15.38</b>                           | <b>13.70</b>              | -                                           | -                                           | <b>0.74*</b>                             |
| <b>SD</b>      |                 | <b>4.50</b>                             | <b>7.84</b>                 | <b>4.13</b>                   | <b>10.26</b> | <b>4.13</b>                      | <b>4.68</b>          | <b>3.67 (3.09)</b>                   | <b>6.24 (4.47)</b>                  | <b>3.44</b>                                 | <b>2.91</b>                            | <b>5.22</b>               | -                                           | -                                           | <b>0.61*</b>                             |

Abbreviations: AU = arbitrary units; IMA = isometric muscle action; HIMA = holding IMA; le = left; min. = minimum; M = arithmetic mean; MVIC = maximal voluntary isometric contraction; no. = number; PIMA = pulling IMA; pp = percent points; rHb = relative hemoglobin amount; ri = right; RP = reversal point; SD = standard deviation; SS = steady state; SvO<sub>2</sub> = capillary venous oxygen saturation of hemoglobin; TTF = time to task failure;  $\rho$  = Spearman's rank correlation coefficient.

\* calculated by use of Fisher's Z-transformation

Table S2. Single values of fatiguing measurements of type II behavior.

| IMA               | subject<br>no._arm | baseline<br>value<br>SvO <sub>2</sub><br>in % | baseline<br>value<br>rHb<br>in AU | SvO <sub>2</sub><br>min.<br>in % | TTF<br>in s | SvO <sub>2</sub><br>SS<br>mean<br>in % | rHb SS<br>mean<br>in AU | extent of<br>deoxy-<br>genation<br>in pp (%) | extent of rHb<br>change<br>in AU (%) | time until<br>min. of rHb<br>before SS<br>in s | time<br>until<br>SvO <sub>2</sub> SS<br>in s | time until<br>rHb SS<br>in s | SvO <sub>2</sub> at<br>RP <sub>1</sub><br>in % | SvO <sub>2</sub><br>at<br>RP <sub>2</sub><br>in % | $\rho$ be-<br>tween<br>rHb &<br>SvO <sub>2</sub> |
|-------------------|--------------------|-----------------------------------------------|-----------------------------------|----------------------------------|-------------|----------------------------------------|-------------------------|----------------------------------------------|--------------------------------------|------------------------------------------------|----------------------------------------------|------------------------------|------------------------------------------------|---------------------------------------------------|--------------------------------------------------|
| type II           |                    |                                               |                                   |                                  |             |                                        |                         |                                              |                                      |                                                |                                              |                              |                                                |                                                   |                                                  |
| fatiguing<br>HIMA | 02_le              | 72.86                                         | 56.87                             | 58.00                            | 43.08       | 59.07                                  | 58.37                   | 13.80 (10.05)                                | 1.50 (0.88)                          | 12.00                                          | 17.80                                        | 18.70                        | 62.00                                          | 62.00                                             | −0.81                                            |
|                   | 03_le              | 74.51                                         | 76.36                             | 55.00                            | 19.55       | 55.50                                  | 71.71                   | 19.01 (14.16)                                | −4.64 (−3.33)                        | 5.68                                           | 11.45                                        | 11.45                        | 59.00                                          | 59.00                                             | −0.41                                            |
|                   | 05_le              | 70.47                                         | 62.94                             | 46.73                            | 45.00       | 47.86                                  | 87.41                   | 22.61 (15.94)                                | 24.47 (21.39)                        | 1.18                                           | 12.63                                        | 16.95                        | 58.84                                          | 56.63                                             | −0.74                                            |
|                   | 13_le              | 84.07                                         | 83.32                             | 59.88                            | 48.95       | 61.55                                  | 56.20                   | 22.52 (18.93)                                | −27.12 (−15.24)                      | 4.65                                           | 15.13                                        | 18.00                        | 60.56                                          | 63.04                                             | −0.91                                            |
|                   | 14_le              | 78.34                                         | 81.32                             | 24.16                            | 43.08       | 27.56                                  | 94.02                   | 50.78 (39.78)                                | 12.70 (11.94)                        | 4.20                                           | 18.03                                        | 13.53                        | 58.58                                          | 55.12                                             | −0.48                                            |
|                   | 19_le              | 78.28                                         | 63.87                             | 50.00                            | 31.30       | 51.01                                  | 72.92                   | 27.26 (21.34)                                | 9.04 (6.59)                          | 4.30                                           | 10.73                                        | 11.85                        | 60.00                                          | 61.00                                             | −0.91                                            |
|                   | 21_le              | 73.03                                         | 69.51                             | 21.58                            | 58.73       | 25.01                                  | 85.99                   | 48.02 (35.07)                                | 16.47 (14.17)                        | 6.43                                           | 17.70                                        | 11.38                        | 58.90                                          | 55.94                                             | −0.18                                            |
|                   | 01_ri              | 64.01                                         | 65.92                             | 50.72                            | 45.03       | 51.98                                  | 83.97                   | 12.03 (7.70)                                 | 18.05 (11.90)                        | 4.83                                           | 24.93                                        | 23.13                        | 58.70                                          | 58.36                                             | −0.93                                            |
|                   | 03_ri              | 78.02                                         | 81.02                             | 44.00                            | 25.45       | 45.21                                  | 92.51                   | 32.81 (25.60)                                | 11.49 (10.63)                        | 4.25                                           | 12.00                                        | 10.93                        | 57.00                                          | 57.00                                             | −0.83                                            |
|                   | 05_ri              | 62.27                                         | 75.68                             | 37.93                            | 39.15       | 42.36                                  | 106.82                  | 19.90 (12.39)                                | 31.14 (33.26)                        | 6.03                                           | 11.40                                        | 14.13                        | 55.08                                          | 55.50                                             | −0.72                                            |
|                   | 06_ri              | 65.78                                         | 48.24                             | 54.62                            | 74.38       | 57.02                                  | 57.57                   | 8.75 (5.76)                                  | 9.34 (5.37)                          | 8.08                                           | 13.98                                        | 16.68                        | 60.17                                          | 61.64                                             | −0.97                                            |
|                   | 13_ri              | 62.38                                         | 56.58                             | 48.00                            | 47.00       | 49.92                                  | 72.61                   | 12.46 (7.78)                                 | 16.03 (11.64)                        | 15.55                                          | 15.13                                        | 16.75                        | 59.00                                          | 61.00                                             | −0.97                                            |
|                   | 14_ri              | 78.62                                         | 79.30                             | 26.51                            | 43.08       | 28.79                                  | 88.83                   | 49.83 (39.18)                                | 9.53 (8.47)                          | 5.65                                           | 11.80                                        | 7.30                         | 55.93                                          | 54.63                                             | −0.46                                            |
|                   | 17_ri              | 72.72                                         | 57.62                             | 55.38                            | 41.13       | 56.72                                  | 65.11                   | 16.00 (11.64)                                | 7.49 (4.88)                          | 7.18                                           | 13.90                                        | 13.90                        | 61.76                                          | 61.84                                             | −0.95                                            |
| fatiguing<br>PIMA | 19_ri              | 72.05                                         | 73.27                             | 41.54                            | 35.23       | 42.49                                  | 97.82                   | 29.56 (21.30)                                | 24.55 (24.01)                        | 2.85                                           | 13.68                                        | 12.95                        | 55.86                                          | 56.59                                             | −0.46                                            |
|                   | 21_ri              | 76.89                                         | 84.91                             | 43.80                            | 39.13       | 45.69                                  | 88.80                   | 31.20 (23.98)                                | 3.89 (3.45)                          | 5.65                                           | 11.63                                        | 13.43                        | 55.56                                          | 56.51                                             | −0.80                                            |
|                   | 24_ri              | 64.92                                         | 59.93                             | 41.38                            | 56.78       | 45.75                                  | 87.46                   | 19.17 (12.44)                                | 27.53 (24.08)                        | 5.05                                           | 15.48                                        | 14.75                        | 58.89                                          | 59.37                                             | −0.97                                            |
|                   | 02_le              | 80.32                                         | 56.38                             | 59.00                            | 47.00       | 59.00                                  | 64.34                   | 21.32 (17.12)                                | 7.96 (5.12)                          | 4.05                                           | 13.65                                        | 12.00                        | 62.00                                          | 63.00                                             | −0.76                                            |
|                   | 03_le              | 78.08                                         | 79.23                             | 40.00                            | 48.93       | 43.38                                  | 84.29                   | 34.70 (27.09)                                | 5.06 (4.26)                          | 11.83                                          | 14.83                                        | 18.45                        | 58.00                                          | 55.00                                             | −0.55                                            |
|                   | 05_le              | 74.91                                         | 73.18                             | 50.83                            | 29.38       | 51.77                                  | 82.00                   | 23.14 (17.33)                                | 8.83 (7.24)                          | 6.38                                           | 8.10                                         | 8.83                         | 57.27                                          | 58.25                                             | −0.63                                            |
|                   | 01_ri              | 73.99                                         | 76.63                             | 54.04                            | 48.93       | 55.52                                  | 75.94                   | 18.47 (13.66)                                | −0.68 (−0.52)                        | 9.55                                           | 25.20                                        | 23.38                        | 58.50                                          | 60.15                                             | −0.71                                            |
|                   | 02_ri              | 69.81                                         | 55.88                             | 60.00                            | 58.70       | 60.70                                  | 58.51                   | 9.12 (6.37)                                  | 2.62 (1.53)                          | 6.23                                           | 16.18                                        | 23.88                        | 62.00                                          | 62.00                                             | −0.87                                            |
|                   | 03_ri              | 78.29                                         | 76.83                             | 44.00                            | 54.80       | 47.81                                  | 83.69                   | 30.48 (23.86)                                | 6.87 (5.75)                          | 7.90                                           | 17.15                                        | 16.25                        | 59.00                                          | 60.00                                             | −0.96                                            |
|                   | 05_ri              | 66.90                                         | 78.99                             | 41.09                            | 33.28       | 41.64                                  | 100.89                  | 25.25 (16.89)                                | 21.89 (22.09)                        | 5.98                                           | 19.55                                        | 16.63                        | 54.60                                          | 56.40                                             | −0.79                                            |
|                   | 06_ri              | 79.64                                         | 59.07                             | 56.19                            | 66.55       | 58.26                                  | 54.49                   | 21.38 (17.03)                                | −4.58 (−2.50)                        | 14.03                                          | 16.40                                        | 17.30                        | 60.30                                          | 61.80                                             | −0.87                                            |

|  |          |              |              |              |              |              |              |                      |                    |             |              |              |              |              |               |
|--|----------|--------------|--------------|--------------|--------------|--------------|--------------|----------------------|--------------------|-------------|--------------|--------------|--------------|--------------|---------------|
|  | 07_ri    | 74.25        | 49.51        | 57.00        | 52.85        | 58.03        | 43.18        | 16.22 (12.04)        | −6.32 (−2.73)      | 8.65        | 14.50        | 9.10         | 60.00        | 60.00        | −0.18         |
|  | <b>M</b> | <b>73.28</b> | <b>68.55</b> | <b>46.98</b> | <b>45.25</b> | <b>48.83</b> | <b>77.52</b> | <b>24.45 (18.25)</b> | <b>8.96 (8.24)</b> | <b>6.85</b> | <b>15.11</b> | <b>15.06</b> | <b>58.75</b> | <b>58.91</b> | <b>−0.81*</b> |
|  | SD       | 5.97         | 11.21        | 10.79        | 12.40        | 10.09        | 16.35        | 11.59 (9.35)         | 12.39 (10.48)      | 3.39        | 3.95         | 4.35         | 2.14         | 2.72         | 0.52*         |

Note: Abbreviations can be found on the first page.

**Table S3.** Single values of MVIC-tests of type I behaviors.

| IMA   | subject<br>no. arm<br>trial no. | baseline<br>value SvO <sub>2</sub><br>in % | baseline<br>value rHb<br>in AU | SvO <sub>2</sub><br>min.<br>in % | TTF<br>in s | SvO <sub>2</sub> SS<br>mean<br>in % | rHb SS<br>mean<br>in AU | extent of<br>deoxygenation<br>in pp (%) | extent of rHb<br>decrease<br>in AU (%) | time until<br>min. of rHb<br>before SS<br>in s | time<br>until<br>SvO <sub>2</sub> SS<br>in s | time<br>until<br>rHb SS<br>in s | SvO <sub>2</sub><br>at RP <sub>1</sub><br>in % | SvO <sub>2</sub><br>at RP <sub>2</sub><br>in % |
|-------|---------------------------------|--------------------------------------------|--------------------------------|----------------------------------|-------------|-------------------------------------|-------------------------|-----------------------------------------|----------------------------------------|------------------------------------------------|----------------------------------------------|---------------------------------|------------------------------------------------|------------------------------------------------|
|       |                                 |                                            |                                |                                  |             |                                     |                         | type I                                  |                                        |                                                |                                              |                                 |                                                |                                                |
|       | 01_le_1                         | 81.35                                      | 57.73                          | 70.13                            | ~4s         | -                                   | -                       | 11.22 (13.79)                           | 10.63 (18.42)                          | -                                              | -                                            | -                               | -                                              | -                                              |
|       | 01_le_2                         | 77.14                                      | 53.64                          | 64.6                             | ~4s         | -                                   | -                       | 12.54 (16.26)                           | 12.53 (23.36)                          | -                                              | -                                            | -                               | -                                              | -                                              |
|       | 02_le_1                         | 71.52                                      | 54.00                          | 62.29                            | ~4s         | -                                   | -                       | 9.23 (12.91)                            | 11.07 (20.50)                          | -                                              | -                                            | -                               | -                                              | -                                              |
|       | 02_le_2                         | 64.51                                      | 54.79                          | 61.64                            | ~4s         | -                                   | -                       | 2.87 (4.45)                             | 10.15 (18.52)                          | -                                              | -                                            | -                               | -                                              | -                                              |
|       | 06_le_1                         | 67.12                                      | 49.47                          | 61.26                            | ~4s         | -                                   | -                       | 5.86 (8.73)                             | 5.79 (11.70)                           | -                                              | -                                            | -                               | -                                              | -                                              |
|       | 06_le_2                         | 66.18                                      | 51.65                          | 60.36                            | ~4s         | -                                   | -                       | 5.82 (8.80)                             | 6.79 (13.14)                           | -                                              | -                                            | -                               | -                                              | -                                              |
| MVIC- | 07_le_1                         | 76.32                                      | 46.44                          | 71.29                            | ~4s         | -                                   | -                       | 5.03 (6.59)                             | 4.87 (10.49)                           | -                                              | -                                            | -                               | -                                              | -                                              |
| test  | 07_le_2                         | 77.35                                      | 48.61                          | 71                               | ~4s         | -                                   | -                       | 6.35 (8.21)                             | 6.98 (14.35)                           | -                                              | -                                            | -                               | -                                              | -                                              |
| PIMA  | 01_ri_1                         | 69.48                                      | 64.52                          | 57.43                            | ~4s         | -                                   | -                       | 12.05 (17.34)                           | 11.68 (18.10)                          | -                                              | -                                            | -                               | -                                              | -                                              |
|       | 02_ri_1                         | 67.91                                      | 51.31                          | 62.29                            | ~4s         | -                                   | -                       | 5.62 (8.28)                             | 5.02 (9.79)                            | -                                              | -                                            | -                               | -                                              | -                                              |
|       | 02_ri_2                         | 70.36                                      | 54.58                          | 62.00                            | ~4s         | -                                   | -                       | 8.36 (11.88)                            | 7.94 (14.55)                           | -                                              | -                                            | -                               | -                                              | -                                              |
|       | 06_ri_1                         | 66.66                                      | 45.19                          | 59.76                            | ~4s         | -                                   | -                       | 6.90 (10.36)                            | 5.26 (11.64)                           | -                                              | -                                            | -                               | -                                              | -                                              |
|       | 06_ri_2                         | 68.53                                      | 48.00                          | 60.02                            | ~4s         | -                                   | -                       | 8.51 (12.42)                            | 7.50 (15.63)                           | -                                              | -                                            | -                               | -                                              | -                                              |
|       | 07_ri_1                         | 73.95                                      | 46.93                          | 60.00                            | ~4s         | -                                   | -                       | 13.95 (18.86)                           | 12.93 (27.56)                          | -                                              | -                                            | -                               | -                                              | -                                              |
|       | 07_ri_2                         | 72.16                                      | 46.21                          | 57.64                            | ~4s         | -                                   | -                       | 14.52 (20.13)                           | 8.92 (19.30)                           | -                                              | -                                            | -                               | -                                              | -                                              |
|       | <b>M</b>                        | <b>71.37</b>                               | <b>51.54</b>                   | <b>62.78</b>                     | -           | -                                   | -                       | <b>8.59 (11.93)</b>                     | <b>8.54 (16.47)</b>                    | -                                              | -                                            | -                               | -                                              | -                                              |
|       | SD                              | 4.92                                       | 5.20                           | 4.53                             | -           | -                                   | -                       | 3.55 (4.64)                             | 2.80 (5.01)                            | -                                              | -                                            | -                               | -                                              | -                                              |

Note: Abbreviations can be found on the first page.

Table S4. Single values of MVIC-tests of type II behaviors.

| IMA.              | subject<br>no._arm<br>trial no. | baseline<br>value<br>SvO <sub>2</sub> in % | baseline<br>value rHb<br>in AU | SvO <sub>2</sub><br>min.<br>in % | TTF<br>in s | SvO <sub>2</sub><br>SS<br>mean<br>in % | rHb SS<br>mean<br>in AU | extent of<br>deoxygenation<br>in pp (%) | extent of rHb<br>change<br>in AU (%) | time until<br>min. of rHb<br>before SS<br>in s | time<br>until<br>SvO <sub>2</sub><br>SS in s | time until<br>rHb SS<br>in s | SvO <sub>2</sub><br>at RP <sub>1</sub><br>in % | SvO <sub>2</sub><br>at RP <sub>2</sub><br>in % |
|-------------------|---------------------------------|--------------------------------------------|--------------------------------|----------------------------------|-------------|----------------------------------------|-------------------------|-----------------------------------------|--------------------------------------|------------------------------------------------|----------------------------------------------|------------------------------|------------------------------------------------|------------------------------------------------|
| type II           |                                 |                                            |                                |                                  |             |                                        |                         |                                         |                                      |                                                |                                              |                              |                                                |                                                |
| MVIC-test<br>PIMA | 03_le_1                         | 69.55                                      | 71.04                          | 50.64                            | ~4s         | -                                      | -                       | 18.91 (27.19)                           | 2.68 (3.78)                          | -                                              | -                                            | -                            | 57.19                                          | 58.71                                          |
|                   | 03_le_2                         | 76.22                                      | 76.14                          | 57.29                            | ~4s         | -                                      | -                       | 18.93 (24.84)                           | -14.07 (-18.48)                      | -                                              | -                                            | -                            | 57.46                                          | 58.07                                          |
|                   | 05_le_1                         | 72.89                                      | 64.51                          | 53.90                            | ~4s         | -                                      | -                       | 18.99 (26.05)                           | -1.48 (-2.29)                        | -                                              | -                                            | -                            | 61.69                                          | 58.42                                          |
|                   | 05_le_2                         | 65.74                                      | 61.05                          | 50.24                            | ~4s         | -                                      | -                       | 15.50 (23.58)                           | 13.10 (21.45)                        | -                                              | -                                            | -                            | 59.32                                          | 58.43                                          |
|                   | 01_ri_2                         | 63.09                                      | 65.87                          | 53.63                            | ~4s         | -                                      | -                       | 9.46 (14.99)                            | 9.23 (14.01)                         | -                                              | -                                            | -                            | 59.12                                          | 58.47                                          |
|                   | 03_ri_1                         | 70.03                                      | 67.19                          | 50.64                            | ~4s         | -                                      | -                       | 19.39 (27.69)                           | 5.48 (8.16)                          | -                                              | -                                            | -                            | 57.21                                          | 57.93                                          |
|                   | 03_ri_2                         | 69.67                                      | 67.33                          | 49.29                            | ~4s         | -                                      | -                       | 20.38 (29.25)                           | 9.45 (14.04)                         | -                                              | -                                            | -                            | 57.50                                          | 58.93                                          |
|                   | 05_ri_1                         | 64.06                                      | 70.48                          | 48.37                            | ~4s         | -                                      | -                       | 15.69 (24.50)                           | 7.43 (10.54)                         | -                                              | -                                            | -                            | 57.48                                          | 56.02                                          |
|                   | 05_ri_2                         | 65.32                                      | 73.07                          | 50.19                            | ~4s         | -                                      | -                       | 15.13 (23.17)                           | 3.83 (5.24)                          | -                                              | -                                            | -                            | 56.16                                          | 55.38                                          |
| <b>M</b>          |                                 | <b>68.51</b>                               | <b>68.52</b>                   | <b>51.58</b>                     | -           | -                                      | -                       | <b>16.93 (24.58)</b>                    | <b>3.96 (6.27)</b>                   | -                                              | -                                            | -                            | <b>58.13</b>                                   | <b>57.82</b>                                   |
| SD                |                                 | 4.34                                       | 4.62                           | 2.81                             | -           | -                                      | -                       | 3.41 (4.12)                             | 8.00 (11.54)                         | -                                              | -                                            | -                            | 1.66                                           | 1.25                                           |

Note: Abbreviations can be found on the first page.
